# Supplementary material for: A novel pan-Nox inhibitor, APX-115, protects kidney injury in streptozotocin-induced diabetic mice: possible role of peroxisomal and mitochondrial biogenesis
Source: PubMed Central journal article supplement (PMC5650335; doi:10.18632/oncotarget.18540), 2017-06-16
Supplement: oncotarget-08-74217-s001.pdf [file oncotarget-08-74217-s001.pdf]

# **A novel pan-Nox inhibitor, APX-115, protects kidney injury in streptozotocin-induced diabetic mice: possible role of peroxisomal and mitochondrial biogenesis**

## **SUPPLEMENTARY MATERIALS**

### **MATERIALS AND METHODS**

#### **Immunohistochemistry of 8-oxo-dG and nitrotyrosine**

Paraffin-embedded kidney sections were stained anti-8-oxo-dG (1:400; Trevigen Inc., Trevigen, USA) and anti-nitrotyrosine (1:200; Santa-Cruz Biotechnology) antibodies. Original magnification: 100×; scale bar: 100 μm. Images were captured using a Zeiss microscope equipped with an Axio Cam HRC digital camera and

Axio Cam software (Carl Zeiss, Thornwood, NY, USA). Staining intensities were then quantified using Image-Pro Plus 4.5 software (Media 149 Cybernetics, Silver Springs, MD, USA).

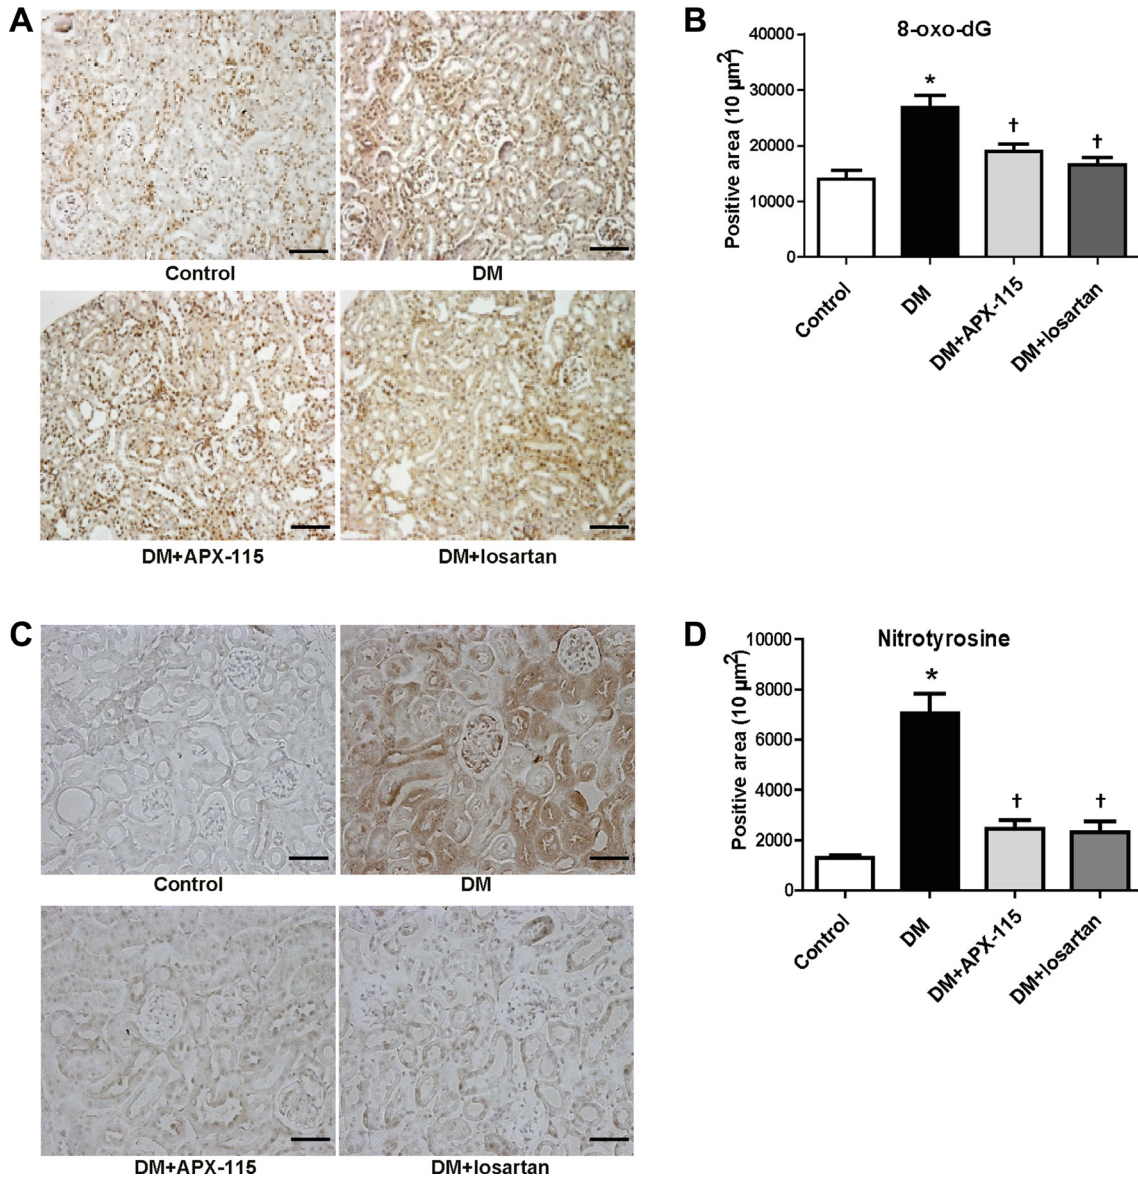

**Supplementary Figure 1: Effect of APX-115 on oxidative stress in the kidneys.** Paraffin-embedded kidney sections were stained with (A and B) anti-8-oxo-dG (1:400) and (C and D) anti-nitrotyrosine (1:200) antibodies. Original magnification: 100 $\times$ ; scale bar: 100  $\mu\text{m}$ . Data are presented as means  $\pm$  SE of 10–12 mice/group; \* $p < 0.05$  vs. control, † $p < 0.05$  vs. DM.
